# Supplementary material
Source: Research Square preprint supplement (doi:10.21203/rs.3.rs-9594446/v1)
Supplement: Supplementary file 1 [file 65b5f6a25e9a2c138c9ffd3b.docx]

**Appendix A**

**The Firefighter Life Events Scale (FLES): Final Item Pool**

**Instructions:** The following items describe life events that firefighters may encounter in their daily work and personal lives. Please respond based on your actual experiences over the past **one year**. If an event did not occur, select "Did not occur." If an event occurred, please select the option that best corresponds to the impact severity of the event on you. Please answer honestly.

| **Subscale** | **Dimension** | **Item** | **Did not occur (0)** | **No impact (1)** | **Mild impact (2)** | **Moderate impact (3)** | **Severe impact (4)** | **Extreme impact (5)** |
| --- | --- | --- | --- | --- | --- | --- | --- | --- |
| Family Stress Events | Family Conflict | 1. Difficulty fulfilling family responsibilities |  |  |  |  |  |  |
| 2. Internal family conflicts |  |  |  |  |  |  |
| 3. Long-term separation from spouse |  |  |  |  |  |  |
| 4. Difficulty disciplining children |  |  |  |  |  |  |
| 5. Dissatisfaction with sexual life |  |  |  |  |  |  |
| Family Economy | 6. High pressure regarding future employment or career transition |  |  |  |  |  |  |
| 7. Family financial difficulties |  |  |  |  |  |  |
| 8. Tight family housing conditions |  |  |  |  |  |  |
| 9. Insufficient work income |  |  |  |  |  |  |
| Family Changes | 10. Family encountered an unexpected accident |  |  |  |  |  |  |
| 11. Relatives or friends became ill or injured |  |  |  |  |  |  |
| 12. Death of a relative or friend |  |  |  |  |  |  |
| Occupational Stress Events | Workload | 13. High training intensity |  |  |  |  |  |  |
| 14. Poor training performance |  |  |  |  |  |  |
| 15. Difficulty in promotion or advancement |  |  |  |  |  |  |
| 16. Facing examinations, competitions, skill assessments, or contests |  |  |  |  |  |  |
| 17. Frequent emergency or rescue missions |  |  |  |  |  |  |
| Interpersonal Conflict | 18. Experienced unfair treatment at work |  |  |  |  |  |  |
| 19. Tense relationship with superiors |  |  |  |  |  |  |
| 20. Conflict with colleagues |  |  |  |  |  |  |
| 21. Lost face in public |  |  |  |  |  |  |
| 22. Lack of support from colleagues or superiors |  |  |  |  |  |  |
| Trauma Exposure | 23. Confronted casualty scenes during work |  |  |  |  |  |  |
| 24. Colleague (teammate) severely injured |  |  |  |  |  |  |
| 25. Colleague (teammate) passed away |  |  |  |  |  |  |

**Scoring:** Each item is scored on a 6-point scale: 0 = Did not occur; 1 = No impact; 2 = Mild impact; 3 = Moderate impact; 4 = Severe impact; 5 = Extreme impact. Subscale scores are obtained by summing items within each dimension. Higher scores indicate greater psychological health impacts from negative life events.

***Note.*** *This scale was developed and validated by Wang et al. (2026) based on work–family boundary theory. For permission to use this scale, please contact the corresponding author.*
